# Supplementary material
Source: PubMed Central journal article supplement (PMC7406242)
Supplement: jciinsight-5-139834-s216.pdf [file jciinsight-5-139834-s216.pdf]

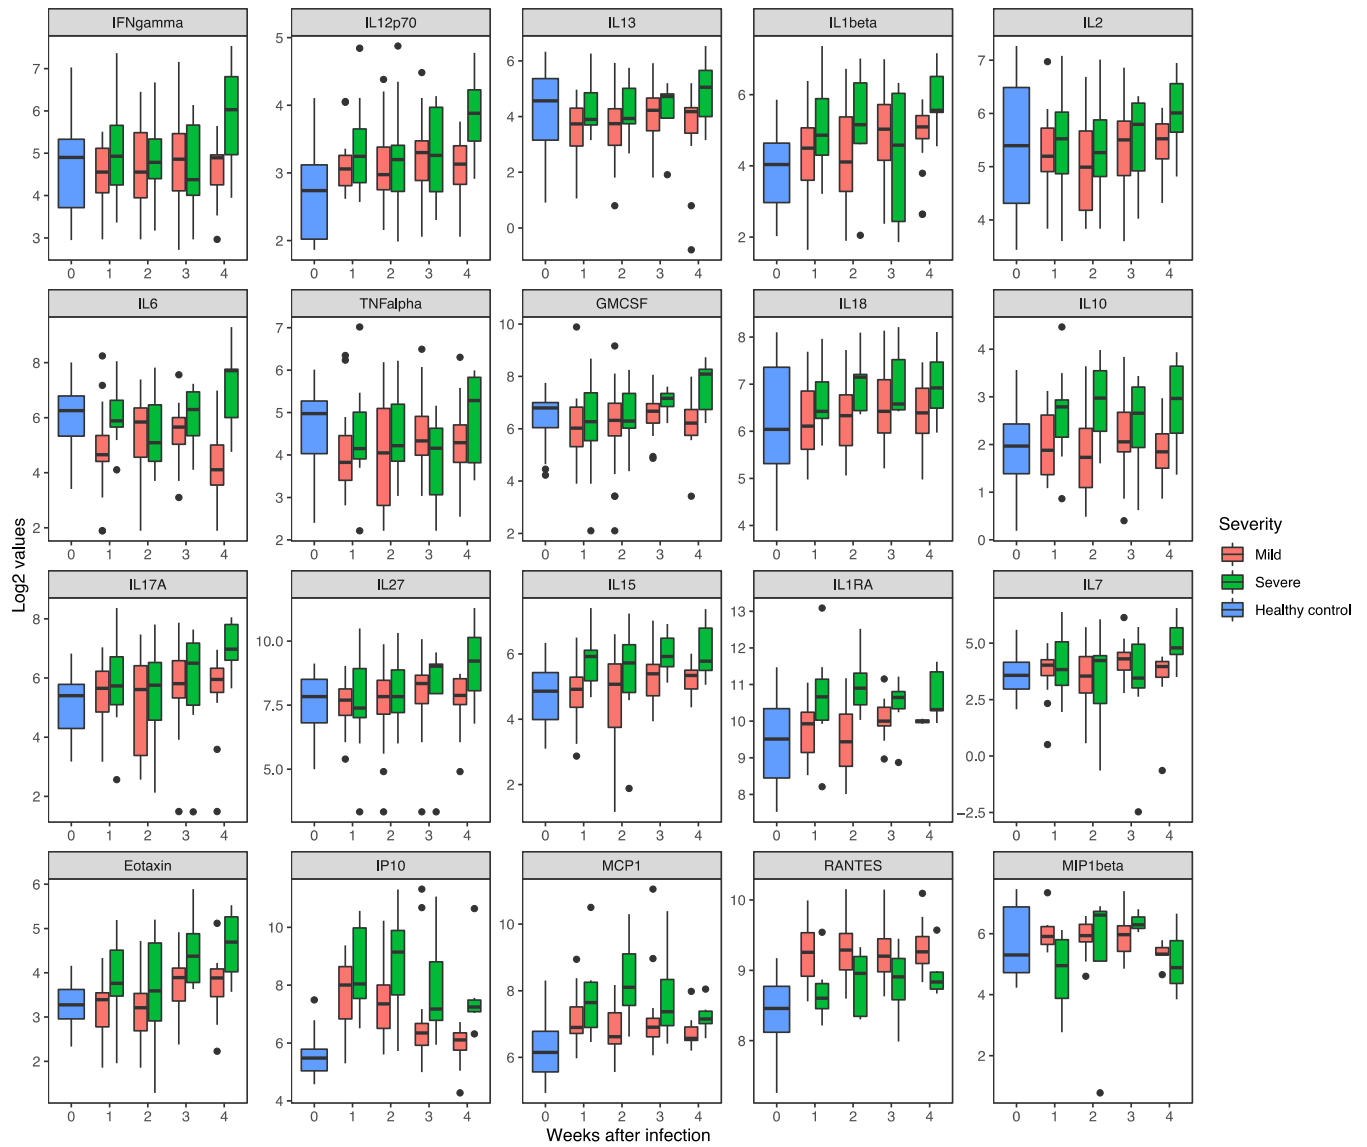

### Supplemental figure 1

Box plots of cytokine levels on the y-axis (Log<sub>2</sub> scale) in blood samples from health control and COVID-19 infection patients in 1<sup>st</sup>, 2<sup>nd</sup>, 3<sup>rd</sup> and 4<sup>th</sup> week of onset of symptom. The central horizontal line indicates the median of each distribution, upper and lower boundaries of the boxes indicate the 3<sup>rd</sup> and 1<sup>st</sup> quartiles.

**Supplemental Table 1: Dynamic changes of cytokines/chemokines in different period of infection**

|         | healthy control         | time of infection (week) | of                       |                           | P values <sup>1</sup> |                    |                  |
|---------|-------------------------|--------------------------|--------------------------|---------------------------|-----------------------|--------------------|------------------|
|         |                         |                          | mild                     | severe                    | mild v.s. health      | severe v.s. health | mild v.s. severe |
| IP-10   | 44.71 (32.34-58.14)     | 1st                      | 257.26 (112.14-409.06)   | 263.94 (180.68-565.80)    | 1.36E-08              | 4.39E-08           | 0.067            |
|         |                         | 2nd                      | 163.50 (87.04-261.26)    | 1577.65 (175.28-)         | 6.13E-08              | 7.32E-07           | 5.31E-03         |
|         |                         | 3rd                      | 81.30 (59.56-105.08)     | 145.42 (93.70-492.62)     | 4.69E-03              | 6.26E-05           | 0.02             |
|         |                         | 4th                      | 68.94 (52.88-84.94)      | 151.68 (118.34-542.39)    | 0.082                 | 1.13E-04           | 1.52E-03         |
| MCP-1   | 70.96 (45.65-114.38)    | 1st                      | 119.30 (99.74-199.86)    | 199.86 (111.5-307.34)     | 4.37E-04              | 1.92E-04           | 0.047            |
|         |                         | 2nd                      | 98.36 (84.12-169.00)     | 274.66 (146.04-672.40)    | 5.61E-03              | 3.87E-05           | 8.62E-05         |
|         |                         | 3rd                      | 119.94 (96.96-145.84)    | 167.28 (106.50-553.05)    | 3.37E-03              | 9.39E-04           | 0.136            |
|         |                         | 4th                      | 95.05 (90.09-123.12)     | 142.59 (119.70-195.96)    | 0.021                 | 8.57E-03           | 0.030            |
| RANTES  | 358.36±123.43           | 1st                      | 638.62±174.80            | 418.16±121.43             | 5.44E-07              | 0.157              | 1.43E-04         |
|         |                         | 2nd                      | 640.36±177.73            | 464.82±136.40             | 3.09E-08              | 0.062              | 3.30E-03         |
|         |                         | 3rd                      | 630.57±171.00            | 480.85±166.81             | 3.97E-07              | 0.076              | 0.017            |
|         |                         | 4th                      | 654.14±162.86            | 502.52±132.39             | 1.39E-06              | 0.032              | 0.026            |
| IL-1 RA | 730.80 (325.11-1332.00) | 1st                      | 974.28 (543.13-1258.26)  | 1628.32 (993.72-2439.77)  | 0.353                 | 0.022              | 0.037            |
|         |                         | 2nd                      | 693.72 (402.30-1431.95)  | 1938.58 (1261.06-3447.48) | 0.712                 | 9.23E-03           | 3.78E-03         |
|         |                         | 3rd                      | 1024.06 (896.34-1415.36) | 1604.92 (1026.63-1981.27) | 0.082                 | 0.091              | 0.264            |
|         |                         | 4th                      | 1022.59 (973.14-1072.04) | 1274.60 (1119.52-2873.74) | 0.550                 | 0.044              | 0.254            |
| IL-10   | 3.92 (2.21-6.02)        | 1st                      | 3.68 (2.58-6.18)         | 6.82 (3.36-7.68)          | 0.477                 | 0.046              | 0.055            |
|         |                         | 2nd                      | 3.32 (2.14-5.22)         | 7.85 (4.34-14.23)         | 0.799                 | 0.014              | 3.85E-03         |
|         |                         | 3rd                      | 4.16 (3.52-6.48)         | 6.30 (3.52-9.96)          | 0.351                 | 0.202              | 0.456            |

|                   |                       |     |                       |                       |          |          |          |
|-------------------|-----------------------|-----|-----------------------|-----------------------|----------|----------|----------|
|                   |                       | 4th | 3.60 (2.80-4.84)      | 8.05 (3.88-13.94)     | 0.937    | 0.041    | 0.012    |
| IL-12             | 6.68 (4.02-8.81)      | 1st | 8.34 (6.94-9.60)      | 9.48 (6.78-13.18)     | 0.030    | 0.032    | 0.203    |
|                   |                       | 2nd | 7.87 (6.66-10.97)     | 9.18 (5.49-15.50)     | 0.084    | 0.172    | 0.600    |
|                   |                       | 3rd | 9.85 (7.34-11.43)     | 9.58 (6.44-16.94)     | 0.020    | 0.088    | 0.830    |
|                   |                       | 4th | 8.77 (6.09-10.88)     | 14.92 (9.85-21.32)    | 0.144    | 3.55E-03 | 6.29E-03 |
| IL-6              | 77.78 (25.85-114.08)  | 1st | 25.18 (21.26-41.82)   | 55.73 (31.62-103.22)  | 0.038    | 0.798    | 0.044    |
|                   |                       | 2nd | 57.42 (19.26-86.84)   | 34.53 (16.06-95.86)   | 0.238    | 0.391    | 0.907    |
|                   |                       | 3rd | 50.58 (32.75-65.81)   | 54.04 (8.62-132.55)   | 0.323    | 0.943    | 0.441    |
|                   |                       | 4th | 17.24 (9.69-56.89)    | 137.00 (20.34-319.84) | 7.66E-03 | 0.137    | 4.38E-03 |
| IL-17             | 42.50 (18.90-57.93)   | 1st | 50.33 (22.88-75.82)   | 53.22 (32.86-107.42)  | 0.279    | 0.148    | 0.502    |
|                   |                       | 2nd | 48.88 (9.00-87.58)    | 56.04 (16.51-155.52)  | 0.908    | 0.570    | 0.566    |
|                   |                       | 3rd | 56.10 (32.09-96.09)   | 94.54 (20.93-165.14)  | 0.158    | 0.415    | 0.992    |
|                   |                       | 4th | 61.86 (41.62-81.88)   | 129.12 (84.64-255.37) | 0.279    | 8.39E-04 | 0.032    |
| Eotaxin           | 9.68 (7.43-13.05)     | 1st | 10.50 (6.64-11.68)    | 13.56 (10.08-25.54)   | 0.792    | 0.049    | 0.033    |
|                   |                       | 2nd | 9.25 (6.22-12.15)     | 12.04 (5.84-19.50)    | 0.479    | 0.433    | 0.221    |
|                   |                       | 3rd | 14.85 (9.77-17.89)    | 21.11(13.38-33.67)    | 0.061    | 2.28E-04 | 9.16E-03 |
|                   |                       | 4th | 14.75 (9.84-17.45)    | 27.65 (14.78-40.52)   | 0.058    | 1.67E-04 | 0.016    |
| GMCSF             | 110.99 (48.69-129.66) | 1st | 65.05 (34.92-123.11)  | 77.09 (34.02-171.22)  | 0.459    | 0.619    | 0.960    |
|                   |                       | 2nd | 79.84 (50.46-128.66)  | 78.47 (51.26-231.37)  | 0.532    | 0.872    | 0.602    |
|                   |                       | 3rd | 101.80 (73.27-135.58) | 143.33 (89.13-185.04) | 0.611    | 0.278    | 0.291    |
|                   |                       | 4th | 74.34 (52.06-113.14)  | 189.22 (55.75-337.86) | 0.709    | 0.044    | 0.035    |
| IFN $\gamma$<br>a | 29.87 (11.08-44.79)   | 1st | 23.48 (16.08-36.12)   | 30.44 (18.08-55.20)   | 0.743    | 0.465    | 0.150    |
|                   |                       | 2nd | 23.48 (15.42-45.56)   | 28.03 (20.42-62.28)   | 0.908    | 0.593    | 0.522    |
|                   |                       | 3rd | 29.02 (15.42-44.82)   | 18.75 (9.70-51.47)    | 0.842    | 0.924    | 0.959    |
|                   |                       | 4th | 29.72 (18.74-31.84)   | 74.07 (25.62-131.19)  | 0.888    | 0.067    | 9.55E-03 |
| IL-13             | 23.77 (8.68-45.18)    | 1st | 13.34 (7.68-20.18)    | 14.90 (11.87-30.66)   | 0.074    | 0.904    | 0.086    |

|          |                        |     |                        |                         |       |          |          |
|----------|------------------------|-----|------------------------|-------------------------|-------|----------|----------|
|          |                        | 2nd | 13.40 (7.82-20.16)     | 15.38 (11.60-43.34)     | 0.137 | 0.916    | 0.297    |
|          |                        | 3rd | 18.76 (11.20-27.08)    | 26.36 (9.58-32.41)      | 0.573 | 0.816    | 0.909    |
|          |                        | 4th | 18.08 (9.46-20.63)     | 36.08 (13.01-61.08)     | 0.184 | 0.420    | 0.086    |
| IL-15    | 29.35 (14.69-46.07)    | 1st | 30.24 (17.98-41.90)    | 60.52 (33.98-98.31)     | 0.900 | 0.010    | 7.46E-03 |
|          |                        | 2nd | 33.63 (13.46-55.04)    | 52.76 (23.94-91.60)     | 0.683 | 0.332    | 0.284    |
|          |                        | 3rd | 41.92 (25.56-55.38)    | 60.52 (41.76-104.94)    | 0.085 | 0.020    | 0.077    |
|          |                        | 4th | 40.51 (27.91-48.39)    | 55.80 (41.84-140.01)    | 0.095 | 0.011    | 0.016    |
| IL-18    | 65.80 (37.36-171.66)   | 1st | 68.96 (46.34-118.76)   | 85.78 (72.52-157.88)    | 0.980 | 0.298    | 0.117    |
|          |                        | 2nd | 80.50 (50.02-118.76)   | 141.80 (86.22-194.77)   | 0.734 | 0.091    | 0.018    |
|          |                        | 3rd | 85.78 (57.28-140.96)   | 95.82 (86.44-198.82)    | 0.462 | 0.138    | 0.141    |
|          |                        | 4th | 84.00 (57.73-123.90)   | 123.73 (81.31-209.23)   | 0.691 | 0.192    | 0.104    |
| IL-1beta | 16.42 (6.46-26.96)     | 1st | 22.58 (11.54-35.68)    | 29.08 (17.22-59.46)     | 0.245 | 0.013    | 0.096    |
|          |                        | 2nd | 17.29 (9.13-41.78)     | 35.68 (24.34-115.56)    | 0.339 | 0.040    | 0.146    |
|          |                        | 3rd | 32.68 (17.30-57.18)    | 25.89 (4.58-75.70)      | 0.028 | 0.562    | 0.391    |
|          |                        | 4th | 34.22 (22.92-47.57)    | 47.18 (39.74-120.68)    | 0.017 | 8.77E-04 | 0.046    |
| IL-2     | 42.84 (17.69-91.64)    | 1st | 36.76 (28.47-54.40)    | 45.96 (24.98-70.42)     | 0.609 | 0.904    | 0.474    |
|          |                        | 2nd | 29.64 (17.18-50.86)    | 38.96 (21.72-85.51)     | 0.229 | 0.956    | 0.346    |
|          |                        | 3rd | 45.33 (28.12-59.58)    | 56.78 (23.98-75.99)     | 0.937 | 0.862    | 0.749    |
|          |                        | 4th | 45.96 (34.02-57.88)    | 64.48 (42.43-109.42)    | 0.899 | 0.272    | 0.061    |
| IL-27    | 227.85 (100.28-395.16) | 1st | 207.68 (118.10-292.58) | 167.54 (123.22-529.68)  | 0.829 | 0.954    | 0.929    |
|          |                        | 2nd | 227.98 (141.62-354.54) | 227.98 (101.20-789.40)  | 0.905 | 0.409    | 0.497    |
|          |                        | 3rd | 324.28 (159.56-422.12) | 517.88 (128.60-650.61)  | 0.452 | 0.757    | 0.918    |
|          |                        | 4th | 235.31 (167.28-373.48) | 692.37 (212.74-1490.42) | 0.759 | 0.026    | 0.034    |
| IL-7     | 11.90 (7.19-20.13)     | 1st | 16.32 (11.43-19.85)    | 14.22 (8.38-40.82)      | 0.631 | 0.409    | 0.598    |
|          |                        | 2nd | 11.66 (6.73-21.60)     | 18.72 (2.83-28.95)      | 0.853 | 0.456    | 0.459    |
|          |                        | 3rd | 19.76 (12.02-24.36)    | 10.94 (6.18-38.40)      | 0.044 | 0.589    | 0.156    |

|           |                     |     |                     |                     |       |          |          |
|-----------|---------------------|-----|---------------------|---------------------|-------|----------|----------|
|           |                     | 4th | 15.56 (9.84-18.38)  | 27.76 (14.78-40.52) | 0.921 | 7.00E-03 | 0.031    |
| MIP-1beta | 70.11 ±51.08        | 1st | 68.61 ±31.90        | 35.56 ±24.99        | 0.441 | 0.074    | 6.94E-03 |
|           |                     | 2nd | 64.50 ±21.25        | 79.07 ±52.70        | 0.490 | 0.568    | 0.301    |
|           |                     | 3rd | 72.80 ±44.19        | 85.35 ±23.41        | 0.534 | 0.346    | 0.423    |
|           |                     | 4th | 41.33 ±11.00        | 48.20 ±46.05        | 0.456 | 0.426    | 0.775    |
| TNF-alpha | 31.70 (13.83-40.53) | 1st | 14.18 (10.58-22.56) | 17.76 (13.88-35.20) | 0.144 | 0.776    | 0.353    |
|           |                     | 2nd | 16.56 (7.02-36.40)  | 18.96 (12.68-50.95) | 0.171 | 0.835    | 0.450    |
|           |                     | 3rd | 20.16 (15.36-30.38) | 18.37 (6.42-28.12)  | 0.745 | 0.192    | 0.152    |
|           |                     | 4th | 19.56 (12.98-34.00) | 39.44 (10.58-61.85) | 0.551 | 0.625    | 0.330    |
| IL-4      | 34.86 ±24.42        | 1st | 32.51 ±22.71        | 69.70 ±65.16        | 0.84  | 0.081    | 0.22     |
|           |                     | 2nd | 41.11 ±24.69        | 36.46 ±10.49        | 0.521 | 0.914    | 0.761    |
|           |                     | 3rd | 50.71 ±53.49        | 68.9                | 0.396 | 0.197    | 0.753    |
|           |                     | 4th | 55.50 ±17.61        | 103.79 ±37.91       | 0.185 | 2.53E-04 | 0.100    |
